# Supplementary material for: Dose Optimization of Colistin: A Systematic Review
Source: MDPI journal article supplement (doi:10.3390/antibiotics10121454), 2021-11-26
Supplement: s1 [file s1]

**Table S1.** Data extraction form for systematic review.

| Review title or ID                                                                                             |                                                                                                                 |                                  |                             |                                  |                                                     |
|----------------------------------------------------------------------------------------------------------------|-----------------------------------------------------------------------------------------------------------------|----------------------------------|-----------------------------|----------------------------------|-----------------------------------------------------|
| Study ID ( <i>surname of first author and year first full report of study was published e.g., Smith 2001</i> ) |                                                                                                                 |                                  |                             |                                  |                                                     |
| General information                                                                                            |                                                                                                                 |                                  |                             |                                  |                                                     |
| Date form completed ( <i>dd/mm/yyyy</i> )                                                                      |                                                                                                                 |                                  |                             |                                  |                                                     |
| Name/ID of person extracting data                                                                              |                                                                                                                 |                                  |                             |                                  |                                                     |
| Reference details                                                                                              |                                                                                                                 |                                  |                             |                                  |                                                     |
| Study author contact details                                                                                   |                                                                                                                 |                                  |                             |                                  |                                                     |
| Publication type ( <i>e.g., full report, abstract, letter</i> )                                                |                                                                                                                 |                                  |                             |                                  |                                                     |
| Notes:                                                                                                         |                                                                                                                 |                                  |                             |                                  |                                                     |
| Study eligibility                                                                                              |                                                                                                                 |                                  |                             |                                  |                                                     |
| Study Characteristics                                                                                          | Eligibility criteria<br>( <i>Insert inclusion criteria for each characteristic as defined in the Protocol</i> ) | Eligibility criteria met?        |                             |                                  | Location in text or source (pg & ¶/fig/table/other) |
| Type of study                                                                                                  | Randomised Controlled Trial                                                                                     | Yes <input type="checkbox"/>     | No <input type="checkbox"/> | Unclear <input type="checkbox"/> |                                                     |
|                                                                                                                | Case Reports                                                                                                    | <input type="checkbox"/>         | <input type="checkbox"/>    | <input type="checkbox"/>         |                                                     |
|                                                                                                                | Cohort Studies                                                                                                  | <input type="checkbox"/>         | <input type="checkbox"/>    | <input type="checkbox"/>         |                                                     |
| Participants                                                                                                   |                                                                                                                 | <input type="checkbox"/>         | <input type="checkbox"/>    | <input type="checkbox"/>         |                                                     |
| Types of intervention                                                                                          |                                                                                                                 | <input type="checkbox"/>         | <input type="checkbox"/>    | <input type="checkbox"/>         |                                                     |
| Types of comparison                                                                                            |                                                                                                                 | <input type="checkbox"/>         | <input type="checkbox"/>    | <input type="checkbox"/>         |                                                     |
| Types of outcome measures                                                                                      |                                                                                                                 | <input type="checkbox"/>         | <input type="checkbox"/>    | <input type="checkbox"/>         |                                                     |
| INCLUDE <input type="checkbox"/>                                                                               |                                                                                                                 | EXCLUDE <input type="checkbox"/> |                             |                                  |                                                     |
| Reason for exclusion                                                                                           |                                                                                                                 |                                  |                             |                                  |                                                     |
| Notes:                                                                                                         |                                                                                                                 |                                  |                             |                                  |                                                     |

**DO NOT PROCEED IF STUDY EXCLUDED FROM REVIEW**

Characteristics of included studies

Methods

|  |                                        |                                                    |
|--|----------------------------------------|----------------------------------------------------|
|  | Descriptions as stated in report/paper | Location in text or source (pg no/fig/table/other) |
|--|----------------------------------------|----------------------------------------------------|



## Quality Assessment Tool for included studies

**Table S2.** Newcastle-Ottawa Quality Assessment Form for Cohort Studies

| Items                                                                                                                                                                                                                                                                                                                                        | Number of stars |
|----------------------------------------------------------------------------------------------------------------------------------------------------------------------------------------------------------------------------------------------------------------------------------------------------------------------------------------------|-----------------|
| <b>Selection</b>                                                                                                                                                                                                                                                                                                                             |                 |
| Representative of exposed studies <sup>A</sup>                                                                                                                                                                                                                                                                                               |                 |
| Selection of non-exposed <sup>B</sup>                                                                                                                                                                                                                                                                                                        |                 |
| Ascertainment of exposure <sup>C</sup>                                                                                                                                                                                                                                                                                                       |                 |
| Demonstration of outcome <sup>D</sup>                                                                                                                                                                                                                                                                                                        |                 |
| <b>Comparability</b>                                                                                                                                                                                                                                                                                                                         |                 |
| Comparability of cohort studies on basis of design <sup>E</sup>                                                                                                                                                                                                                                                                              |                 |
| <b>Outcomes</b>                                                                                                                                                                                                                                                                                                                              |                 |
| Assessment of outcomes <sup>F</sup>                                                                                                                                                                                                                                                                                                          |                 |
| Adequacy of follow-up <sup>G</sup>                                                                                                                                                                                                                                                                                                           |                 |
| <b>Quality Score</b>                                                                                                                                                                                                                                                                                                                         |                 |
| A: *=truly representative or somewhat representative of average in target population<br>B: *=Drawn from the same community<br>C: *=Secured record or structured review<br>D: *=Yes, - = No<br>E: *= Study controls for age, gender, and other factors.<br>F: *=Record linkage or blind assessment, **=Both<br>G: *=follow-up of all subjects |                 |

### Risk of Bias assessment

| Domain                                                                | Risk of bias             |                          |                          | Location in text or source (pg no./fig/table/other) |
|-----------------------------------------------------------------------|--------------------------|--------------------------|--------------------------|-----------------------------------------------------|
|                                                                       | Low                      | High                     | Unclear                  |                                                     |
| Random sequence generation<br>( <i>selection bias</i> )               | <input type="checkbox"/> | <input type="checkbox"/> | <input type="checkbox"/> |                                                     |
| Allocation concealment<br>( <i>selection bias</i> )                   | <input type="checkbox"/> | <input type="checkbox"/> | <input type="checkbox"/> |                                                     |
| Blinding of participants and personnel<br>( <i>performance bias</i> ) | <input type="checkbox"/> | <input type="checkbox"/> | <input type="checkbox"/> |                                                     |
| (if separate judgement by outcome(s) required)                        | <input type="checkbox"/> | <input type="checkbox"/> | <input type="checkbox"/> |                                                     |
| Blinding of outcome assessment<br>( <i>detection bias</i> )           | <input type="checkbox"/> | <input type="checkbox"/> | <input type="checkbox"/> |                                                     |
| (if separate judgement by outcome(s) required)                        | <input type="checkbox"/> | <input type="checkbox"/> | <input type="checkbox"/> |                                                     |
| Incomplete outcome data<br>( <i>attrition bias</i> )                  | <input type="checkbox"/> | <input type="checkbox"/> | <input type="checkbox"/> |                                                     |
| (if separate judgement by outcome(s) required)                        | <input type="checkbox"/> | <input type="checkbox"/> | <input type="checkbox"/> |                                                     |
| Selective outcome reporting?<br>( <i>reporting bias</i> )             | <input type="checkbox"/> | <input type="checkbox"/> | <input type="checkbox"/> |                                                     |
| Other bias                                                            | <input type="checkbox"/> | <input type="checkbox"/> | <input type="checkbox"/> |                                                     |

Notes:

**Table S3:** The Joanna Briggs Institute (JBI) Critical Appraisal Checklist for Case Reports

| Major Components                                                                                                                | Response Options         |                          |                          |                          |
|---------------------------------------------------------------------------------------------------------------------------------|--------------------------|--------------------------|--------------------------|--------------------------|
|                                                                                                                                 | Yes                      | No                       | Unclear                  | Not<br>Applicable        |
| 1. Were patient's demographic characteristics clearly described?                                                                | <input type="checkbox"/> | <input type="checkbox"/> | <input type="checkbox"/> | <input type="checkbox"/> |
| 2. Was the patient's history clearly described and presented as a timeline?                                                     | <input type="checkbox"/> | <input type="checkbox"/> | <input type="checkbox"/> | <input type="checkbox"/> |
| 3. Was the current clinical condition of the patient on presentation clearly described?                                         | <input type="checkbox"/> | <input type="checkbox"/> | <input type="checkbox"/> | <input type="checkbox"/> |
| 4. Were diagnostic tests or assessment methods and the results clearly described?                                               | <input type="checkbox"/> | <input type="checkbox"/> | <input type="checkbox"/> | <input type="checkbox"/> |
| 5. Was the intervention(s) or treatment procedure(s) clearly described?                                                         | <input type="checkbox"/> | <input type="checkbox"/> | <input type="checkbox"/> | <input type="checkbox"/> |
| 6. Was the post-intervention clinical condition clearly described?                                                              | <input type="checkbox"/> | <input type="checkbox"/> | <input type="checkbox"/> | <input type="checkbox"/> |
| 7. Were adverse events (harms) or unanticipated events identified and described?                                                | <input type="checkbox"/> | <input type="checkbox"/> | <input type="checkbox"/> | <input type="checkbox"/> |
| 8. Does the case report provide takeaway lessons?                                                                               | <input type="checkbox"/> | <input type="checkbox"/> | <input type="checkbox"/> | <input type="checkbox"/> |
| Overall appraisal: Include <input type="checkbox"/> Exclude <input type="checkbox"/> Seek further info <input type="checkbox"/> |                          |                          |                          |                          |
|                                                                                                                                 |                          |                          |                          |                          |
